# Supplementary material for: No Significant Difference in Viral Load Between Vaccinated and Unvaccinated, Asymptomatic and Symptomatic Groups When Infected with SARS-CoV-2 Delta Variant
Source: bioRxiv or medRxiv preprint supplement (doi:10.1101/2021.09.28.21264262), 2021-10-05
Supplement: Supplementary file [file media-1.pdf]

**Supplementary Table 2. Individuals involved in generating the data used this study.**

| <b>Affiliation</b>           | <b>Sector</b>                        | <b>Name</b>         |                   |
|------------------------------|--------------------------------------|---------------------|-------------------|
| <b>Healthy Yolo Together</b> | Medical and Administrative Oversight | Ralph Green         |                   |
|                              |                                      | Sheri Belafsky      |                   |
|                              |                                      | Brad Pollock        |                   |
|                              |                                      | Tod Stoltz          |                   |
|                              |                                      | Ken Burtis          |                   |
|                              | Sample Collection                    | Karisa Gold         |                   |
|                              |                                      | Sophia Haro         |                   |
|                              |                                      | Testing             | Vanessa Rashbrook |
|                              |                                      |                     | Lutz Froenicke    |
|                              |                                      |                     | Siranoosh Atari   |
|                              |                                      | Heather Matalaka    |                   |
|                              |                                      | Maria Kohler        |                   |
|                              |                                      | Emily Kumimoto      |                   |
|                              |                                      | Sherri Wykoff-Clary |                   |
|                              |                                      | Sheryl Bernauer     |                   |
|                              |                                      | Nicole Slattengren  |                   |
|                              |                                      | Kazuari Nozue       |                   |
|                              | Helena Chang                         |                     |                   |
|                              | Tommy Tran                           |                     |                   |
|                              | Genotyping and Sequencing            | Ana Menchaca        |                   |
|                              |                                      | Monica Britton      |                   |
|                              |                                      | Van Ly              |                   |
|                              |                                      | Ryan Davis          |                   |
|                              |                                      | Stephanie Liu       |                   |
|                              |                                      | Data Handling       | Matt Settles      |
|                              | Adam Schaal                          |                     |                   |
|                              | Jeff Trunnelle                       |                     |                   |
| <b>Unidos en Salud</b>       | Medical and Administrative Oversight | Salustiano Ribeiro  |                   |
|                              |                                      | Douglas Black       |                   |
|                              |                                      | Jen Nossokoff       |                   |
|                              |                                      | Gabriel Chamie      |                   |
|                              |                                      | Joselin Payan       |                   |
|                              |                                      | Maria Powell        |                   |
|                              |                                      | Shalom Bandi        |                   |
|                              |                                      | Susy Rojas          |                   |
|                              |                                      | Rebecca Valencia    |                   |
|                              |                                      | Data Handling       | James Peng        |

|  |                                                            |                      |
|--|------------------------------------------------------------|----------------------|
|  |                                                            | Simone Manganelli    |
|  | Community, Latino Task Force,<br>and Unidos en Salud Staff | Valerie Tulier-Laiwa |
|  |                                                            | Tracy Gallardo-Brown |
|  |                                                            | Nelson Rivera        |
|  |                                                            | Alejandra Rodriguez  |
|  |                                                            | Chanagan Surrick     |
|  |                                                            | Jonathan Lemus       |
|  |                                                            | Margarita Sanchez    |
|  |                                                            | Cecilia Cuadra       |
|  |                                                            | Sonia Alvarenga      |
|  |                                                            | Patricia Lopez       |
|  |                                                            | Rosario Rodriguez    |
|  |                                                            | Glenda Cifuentes     |
|  |                                                            | Mario Delgado        |
|  |                                                            | Erica Vasquez        |
|  |                                                            | Xzalyn Hernandez     |
|  |                                                            | Patricia Murillo     |
|  |                                                            | Nayeli Veloz         |
|  |                                                            | Julie Satterfield    |
|  |                                                            | Helen Woldemariam    |

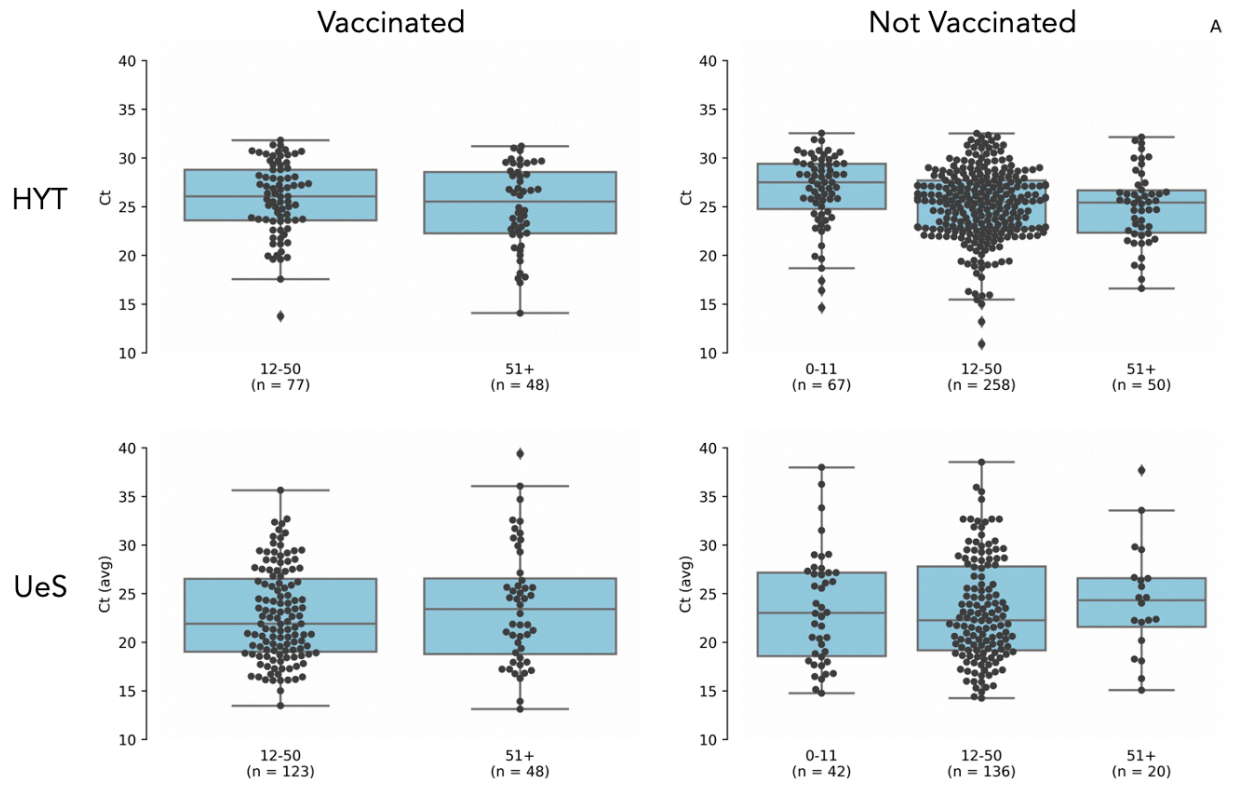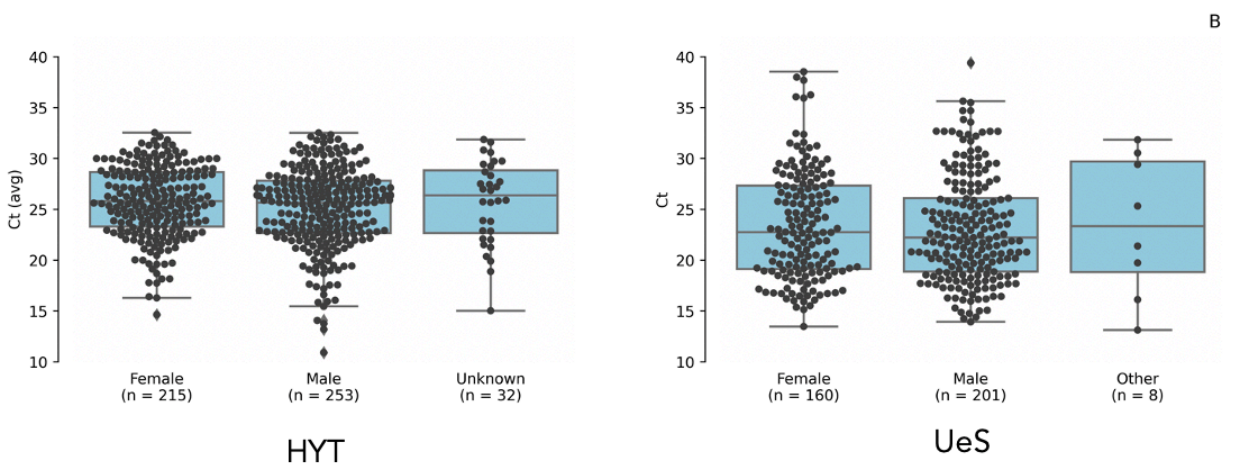

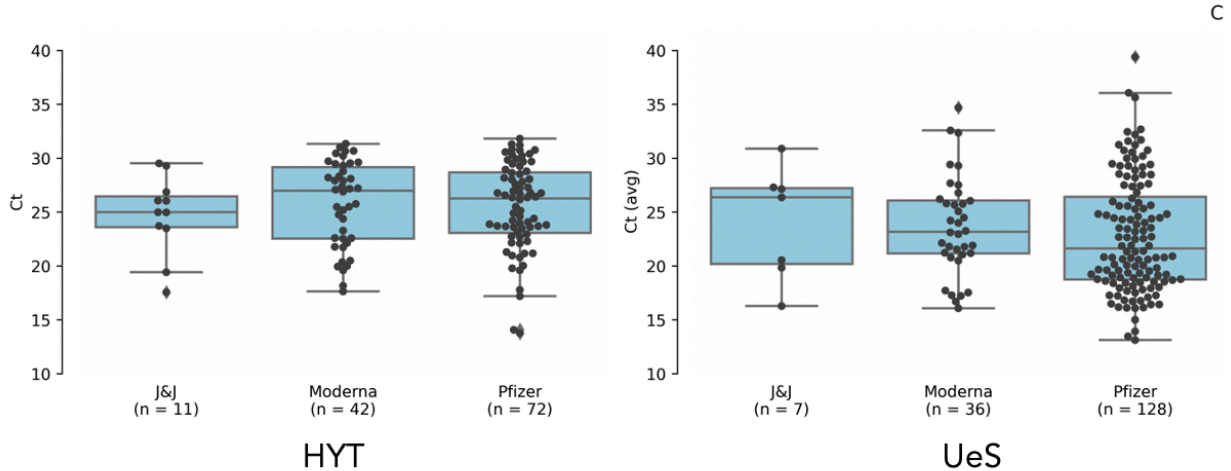

**Supplementary Figure 1. SARS-CoV-2 Ct-values stratified by age group, sex, and vaccine type.** SARS -CoV-2 reverse transcription-polymerase chain reaction cycle threshold values for specimens from patients by age and vaccine status from Healthy Yolo Together (City of Davis and Yolo County, California) and from specimens by vaccine and symptom status from Unidos en Salud (Mission District, San Francisco, California) (Panel A), by gender (Panel B), and by vaccine type (Panel C). Box plots show first quartile, median, and third quartiles in shaded region; diamonds indicate outliers beyond 1.5 times the interquartile range; p-values were calculated with two-sided t-tests.
